# Supplementary material for: PARP-1 controls NK cell recruitment to the site of viral infection
Source: JCI journal article supplement (doi:10.1172/jci.insight.121291), 2019-06-19
Supplement: sd1 [file 1]

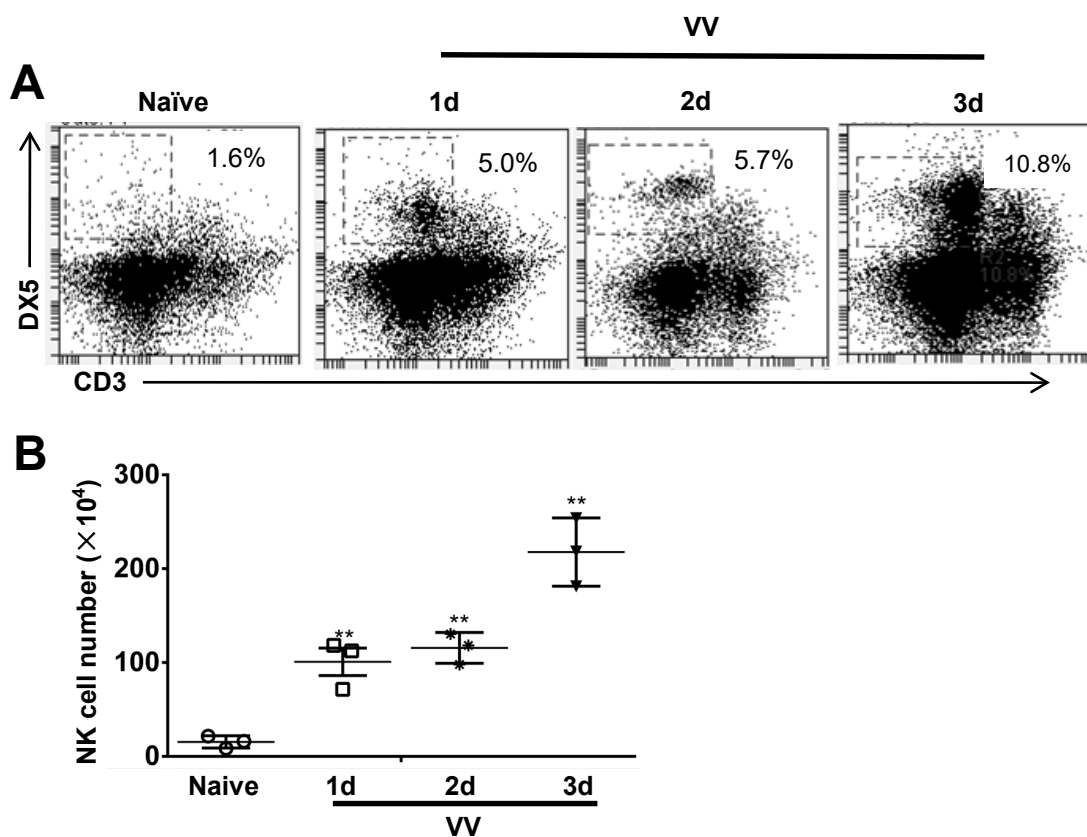

**Supplemental Figure 1. NK cell recruitment in response to intraperitoneal VV infection.** C57BL/6 mice were infected with VV ( $5 \times 10^6$  pfu, i.p.). Naïve mice were used as control. At 1, 2, 3 days after infection, peritoneal fluid was harvested and assayed for DX5<sup>+</sup>CD3<sup>+</sup> NK cells by flow cytometry. **(A)** FACS plots showing percentages of DX5<sup>+</sup>CD3<sup>+</sup> NK cells in the peritoneal fluids. **(B)** The mean absolute NK cell numbers  $\pm$  SD are shown ( $n = 3$ ). \*\* $P < 0.01$ , two-tailed Student's  $t$  test.

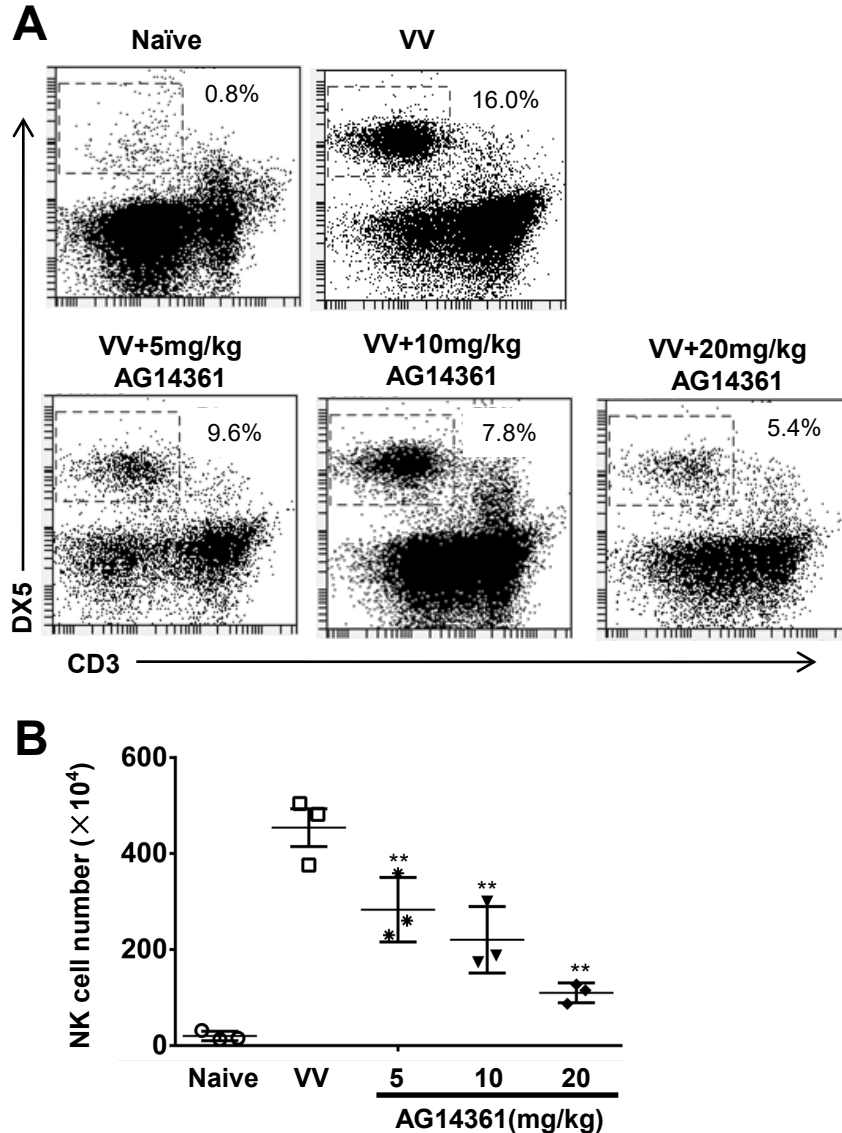

**Supplemental Figure 2. Inhibition of PARP-1 activity suppresses NK cell migration to intraperitoneal VV infection.** C57BL/6 mice were either treated with PARP-1 inhibitor AG14361 (5, 10, or 20 mg/kg, i.v.) or PBS, and subjected to infection with VV ( $5 \times 10^6$  pfu, i.p.). Naïve mice were used as control. Three days later, peritoneal fluid was harvested and assayed for DX5<sup>+</sup>CD3<sup>+</sup> NK cells by flow cytometry. **(A)** FACS plots showing percentages of DX5<sup>+</sup>CD3<sup>+</sup> NK cells in the peritoneal fluids. **(B)** The mean absolute NK cell numbers  $\pm$  SD are shown ( $n = 3$ ). \*\* $P < 0.01$ , two-tailed Student's  $t$  test.
